# Supplementary material for: A versatile and concise route to carbocycles using a 1,6-electrocyclic reaction
Source: Royal Society of Chemistry journal article supplement (doi:10.1039/b311815k), 2004-01-01
Supplement: b311815k.doc [file b311815k.doc]

# A versatile and concise route to carbocycles using a 1,6-electrocyclic reaction.

Svante Brandänge and Hans Leijonmarck

# Experimental

All reactions with butyllithium (commercial) were performed in flame-dried glassware under an atmosphere of argon. THF was freshly distilled from Na/benzophenone; dichloromethane was distilled over CaH2. Allyl phenyl sulfone, methacrolein, *m*-chloroperbenzoic acid, crotonaldehyde and cesium carbonate were commercially available. Flash chromatographic purifications were carried out using Merck silica gel 60A (35-70 ). Melting points are uncorrected. NMR spectra (1H at 400 MHz and 13C at 100 MHz) were recorded on a Varian Mercury spectrometer using CDCl3 as solvent and TMS as internal reference. Reported multiplicities of 13C NMR signals were obtained from DEPT spectra; q stands for CH3, etc. High-resolution EI-MS were run using a JEOL JMS SX/SX102A instrument (direct inlet, 70 eV). UV spectra were measured on a Cary 50Bio UV-Vis spectrophotometer.

**4-Acetoxy-5-methyl-3-phenylsulfonyl-1,5-hexadiene** (**1b**). To a stirred and cooled (ca. –75 oC) solution of allyl phenyl sulfone (2.00 g; 11.0 mmol) in THF (100 mL) was added a solution of butyllithium (1.6 M in hexane; 7.5 mL; 12.0 mmol) during 5 min from a syringe through a septum. After 30 min a solution of methacrolein (0.77 g; 95% purity; 10.4 mmol) in THF (12 mL) was added over a period of 6 min. The reaction mixture was stirred at ca. –75 oC (3 h) and then a solution of acetic anhydride (2.24 g; 21.9 mmol) in THF (20 mL) was added over a period of 10 min. The acetylation mixture was allowed to reach 20 oC during ca. 5 h. After 24 h acetic acid (11 mmol), dissolved in THF (7 mL), was added (2 min). The reaction mixture was poured into 0.2 M hydrochloric acid (100 mL), saturated with NaCl. The aqueous phase was separated and extracted with Et2O (2 x 75 mL). The organic phases were combined and concentrated and the residue, dissolved in dichloromethane (50 mL), was dried (Na2SO4) to give a crude product (3.26 g). Purification of 72% of this material on a silica gel column (42 x 3.7 cm) using toluene/ethyl acetate (20:1) gave 1.84 g, corresponding to an 83% yield of **1b**, 88:12 mixture of diastereomers. None of the isomers was obtained isomerically pure; NMR spectra were recorded on enriched fractions. The corresponding hydroxy sulfone was isolated in 3% yield.

Major isomerof **1b**, 1H NMR (CDCl3):  1.62 (s, 3H), 1.84 (s, 3H), 3.92 (t, *J* = 9.7 Hz, 1H), 4.96 (splitted s, small *J* , 1H), 5.07 (s, 1H), 5.23 (d, *J* = 17.0 Hz, 1H), 5.34 (d, *J* = 10.1 Hz, 1H), 5.50 (dt, *J* = 16.8, 10.0 Hz, 1H), 5.76 (d, *J* = 9.3 Hz, 1H), 7.56 (m, 2H), 7.7-7.6 (m, 1H), 7.87 (m, 2H). 13C NMR:  17.0 (q), 20.8 (q), 71.0 (d), 74.3 (d), 117.8 (t), 125.1 (t), 126.2 (d), 129.0 (d), 129.0 (d), 133.8 (d), 138.7 (s), 139.4 (s), 169.1 (s).

Minor isomerof **1b**, 1H NMR (CDCl3): aromatic hydrogens , 1.68 (s, 3H), 1.95 (s, 3H), 3.66 (dd, *J* = 9.7, 2.0 Hz, 1H), 4.84 (s, 1H), 4.92 (s, 1H), 5.19 (d, *J* = 17.2 Hz, 1H), 5.45 (d, *J* ≈10 Hz, 1H), 5.88 (dt, *J* = 17.2, 10.1 Hz, 1H), 5.90 (d, *J* ≈2 Hz, 1H). 13C NMR:  19.2 (q), 20.7, 71.3 (d), 72.1 (d), 113.3 (t), 125.5 (d), 125.9 (t), 129.2, 133.9, 137.9 (s), 140.0 (s), 168.9; one signal probably obscured; some multiplicities were not determined.

**4-Acetoxy-3-phenylsulfonyl-1,5-hexadiene** (**1a**) was prepared analogously from allyl phenyl sulfone (2.00 g; 11.0 mmol), butyllithium (1.6 M in hexane; 7.5 mL; 12.1 mmol) and acrolein (0.65 g, 11.5 mmol). The acetylation was stopped with hydrochloric acid after 16 h; no acetic acid was used in this case. After purification on silica gel (toluene/Et2O,20:1) **1a** was isolated as a 74:26 mixture of diastereomers (80%); the corresponding hydroxy sulfone was isolated in 3% yield. The major isomer was eluted first and was obtained in pure form; NMR spectra of the minor isomer were recorded on a 62:38 (minor/major) mixture.

Major isomerof **1a**, 1H NMR (CDCl3):  1.95 (s, 3H), 3.95 (dd, *J* = 9.9, 6.2 Hz, 1H), 5.10 (dd, *J* = 16.8, 0.7 Hz, 1H), 5.32 (dd, *J* = 10.4, 0.7 Hz, 1H), 5.36 (dt, *J* = 16.5, 1.1 Hz, 1H), 5.38 (dd, *J* = 10.3, 0.7 Hz, 1H), 5.70 (dt, *J* = 17.1, 10.1 Hz, 1H), 5.84 (t, *J* = 6.2 Hz, 1H), 5.90 (ddd, *J* = 16.8, 10.3, 6.4 Hz, 1H), 7.50-7.60 (m, 2H), 7.60-7.65 (m, 1H), 7.80-7.85 (m, 2H). 13C NMR:  20.8, 71.0, 71.7, 119.4, 125.7, 126.3, 129.0, 129.0, 132.1, 133.9, 138.3, 169.2.

Minor isomerof **1a**, 1H NMR (CDCl3), salient signals:  1.94 (s, 3H), 3.64 (dd, *J* = 9.7, 2.4 Hz, 1H), 5.48 (d, *J* = 10.2 Hz, 1H), 6.03 (dd, *J* = 6.2, ≈1 Hz, 1H). 13C NMR (CDCl3) :  20.8, 70.5, 72.4, 118.9, 125.6, 126.1, 129.0, 129.2, 132.9, 133.9, 138.0, 169.1.

**4-Acetoxy-3-phenylsulfonyl-1,5-heptadiene** (**1c**) was prepared analogously from allyl phenyl sulfone (2.00 g; 11.0 mmol), butyllithium (1.6 M in hexane; 7.5 mL; 12.1 mmol) and crotonaldehyde (0.81 g, 11.5 mmol; trans:cis = 96:4, 1H NMR). After workup, purification on silica gel afforded **1c** as a mixture of four isomers (64%) together with the corresponding alcohol ( 6%). Of the two minor isomers originating from cis-crotonaldehyde, one was seen at *e. g*.  1.77 (dd, *J* = 7.1, 1.8 Hz); the other one was best seen at  3.57 (dd, *J* = 9.7, 2.4 Hz). Purification of the crude condensation product on a silica gel column (toluene-ethyl acetate, 20:1) gave only partial separation of the two isomers originating from trans-crotonaldehyde (ratio 86:14); the major isomer was eluted somewhat faster than the minor isomer.

Major isomerof **1c**, 1H NMR (CDCl3), some salient signals:  1.71 (dd, *J* = 6.6, 1.6 Hz, 3H), 1.90 (s, 3H), 3.94 (dd, *J* = 9.9, 6.6 Hz, 1H), 5.12 (d, *J* = 17.0 Hz, 1H), 5.38 (dd, *J* = 10.2, 1.0 Hz, 1H), 5.45 (ddq, *J* = 15.2, 7.7, 1.7 Hz, 1H), 7.51-7.58 (m, 2H), 7.61-7.67 (m, 1H), 7.81-7.88 (m, 2H). 13C NMR (CDCl3), some salient signals: 21.0, 71.4, 71.9, 138.5, 169.4.

Minor isomerof **1c**, 1H NMR (CDCl3), salient signals:  1.67 (dd, *J* = 6.6, 1.6 Hz), 1.89 (s), 3.62 (dd, *J* = 9.7, 2.4 Hz), 5.23 (d, *J* = 17.2 Hz). 13C NMR (CDCl3), some salient signals: 

**2-Phenylsulfonyl-1,3-cyclohexadiene** (**2a**) Acetate **1a** (272 mg, 0.97 mmol) was stirred with mortared anhydrous sodium carbonate (2.06 g, 19.4 mmol) in refluxing toluene (8 mL, 22 h). The mixture was cooled and partitioned between dichloromethane (40 mL) and water. The aqueous layer was extracted with another portion of dichloromethane and the organic phases were combined and dried (Na2CO3). Evaporation of the solvents gave a residue (208 mg) which contained <0.5% starting material (1H NMR). Purification on a silica gel column (26 x 3 cm; pentane-ethyl acetate, 5:1) gave solid **2a** (175 mg, >98% 1H NMR purity, 82% yield). The product was indistinguishable (1H and 13C NMR) from that prepared by Bäckvall and Juntunen via phenylsulfonylmercuration of 1,3-cyclohexadiene.14a An alternative route to **2a**, starting from cyclohexanone, was recently described by Meyers and Fuchs.14d

**4-Methyl-2-phenylsulfonyl-1,3-cyclohexadiene** (**2b**) was prepared analogously from **1b** (399 mg) and sodium carbonate (2.87 g, 20 equiv.) in toluene. Reflux for 87 h was necessary to complete the reaction. In another run the cyclization was complete after 64 h, indicating that the rate varies with the quality of the sodium carbonate. The 1H NMR spectrum of crude **2b** from the 87 h run showed more contaminants than that of crude **2a**. Purification on a silica gel column (toluene-ethyl acetate, 5:1) gave **2b** (219 mg, >98% 1H NMR purity, 69% yield); mp 75-77 oC (Et2O-pentane); UV (ethanol) max, nm (): 267 (5100), 274 (5000).

1H NMR (CDCl3):  1.79 (s, 3H), 2.11 (br t, *J* = 9.5 Hz, 2H), 2.44 (dt, *J* = 4.7, 9.9 Hz, 2H), 5.83 (s, 1H), 6.80 (t, *J* = 4.6 Hz, 1H), 7.48-7.64 (m, 3H), 7.84-7.92 (m, 2H). 13C NMR (CDCl3):  23.1 (t), 23.4 (q), 26.8 (t), 113.2 (d), 127.8 (d), 129.1 (d), 131.8 (d), 133.1 (d), 139.3 (s), 140.2 (s), 140.4 (s).

Compound **2b** has previously been prepared by Bäckvall and coworkers via phenylsulfonyl-mercuration of 1-methyl-1,3-cyclohexadiene but recorded 1H NMR data were never published.20 Our 1H NMR spectrum was indistinguishable from that recorded by Bäckvall and Plobeck.

**5-Methyl-2-phenylsulfonyl-1,3-cyclohexadiene** (**2c**) was prepared analogously from **1c** (516 mg) and sodium carbonate (3.72 g, 20 equiv.) in toluene (14 mL); reflux for 27 h. Mp 57-58 oC (Et2O-pentane).

EI-MS: *m*/*z*, (rel. abundance): 234 (M+, 100), 233 (55), 219 (8), 141 (27), 91 (70), 77 (90).

Fuchs et al. recently prepared **2c** in 99% ee (mp 54.0-56.0 oC) in eight steps from (+)-pulegone.21 Our 1H and 13C NMR data are indistinguishable from those reported by Fuchs et al.

**1-(Phenylthiomethyl)-cyclopentanol** was prepared using the method of Corey and Seebach.16a An 83% yield was obtained after purification on a silica gel column (toluene-ethyl acetate, 20:1). The 1H NMR spectrum was indistinguishable from that reported.22

**1-(Phenylsulfonylmethyl)-cyclopentanol** was obtained from the above product (2.16 g, 10.35 mmol) by oxidation with *m*-chloroperbenzoic acid (7.14 g of the 50-60% dispersion in water, at least 20.70 mmol of MCPBA) in dichloromethane (90 mL, 0 oC, 1 h). *m*-Chlorobenzoic acid was filtered off, the main portion of the solvent was evaporated and replaced with Et2O (200 mL). The solution was washed first with saturated aq. sodium bisulfite (50 mL), then dilute aq. NaHCO3 (4 x 50 ml of a mixture of saturated solution + 9 parts of H2O). The solvent was evaporated, dichloromethane was added (200 mL) and the solution was dried with Na2SO4. Evaporation gave a crude product (2.51 g, >95% purity) which showed 1H NMR (CDCl3): m, 4H), 1.80-2.00 (m, 4H), 2.8 (br s, 1H), 3.46 (s, 2H), 7.55-7.61 (m, 2H), 7.64-7.70 (m, 1H), 7.92-7.97 (m, 2H); 13C NMR (CDCl3):  23.3, 40.0, 65.2, 79.6, 127.6, 129.4, 133.9, 140.9.

**1-Cyclopentenylmethyl phenyl sulfone** (**3**). A mixture of the above sulfone (2.31 g), *p*-toluenesulfonic acid monohydrate (183 mg; 0.1 equiv.) and toluene (20 mL) was concentrated on the evaporator (bath temperature, 60 oC). This procedure was repeated four times, toluene (50 mL, dried over Na) was added and the mixture was then refluxed for 2.5 h during which time the condensator was twice replaced with a dry one. When TLC showed complete dehydration (2.5 h), the solvent was evaporated and replaced with dichloromethane (100 mL). The solution was washed with 100 ml half-saturated aq. NaHCO3 and then dried (Na2SO4). Evaporation of the solvent left a residue which was recrystallized from toluene-pentane. Three crops provided 2.02 g, which corresponds to an 88% yield from the sulfide. The 1H NMR spectrum and mp (97-98.5 oC) were indistinguishable from those reported for a sample prepared by another route;23 13C NMR (CDCl3): 23.6 (t), 32.8 (t), 35.0 (t), 58.8 (t), 128.3 (d), 129.0 (d), 131.1 (s), 133.6 (d), 135.5 (d), 138.7 (s).

**1-(1-Cyclopentenyl)-3-methyl-1-phenylsulfonyl-3-buten-2-ol** (**4**)**.**

To a stirred and cooled (ca. –30 °C) solution of **3** (2.00 g, 9.00 mmol) in THF (50 mL) was added during 3 min a solution of butyllithium in hexane (1.6 M, 6.2 mL, 9.9 mmol) from a syringe. The reaction mixture was stirred at –30 °C for 30 min and then cooled to –78 °C. A solution of methacrolein (0.73 g, 10.3 mmol) in THF (10 mL) was added during 10 min from a dropping funnel via the wall of the reaction flask. After the mixture had been stirred at ca. –75 °C for 2 h, a solution of acetic acid (1.62 g, 27.0 mmol) in THF (10 mL) was slowly added. The bath temperature was then allowed to reach ca. –60 °C over a period of 30 min and the reaction solution was poured under stirring into water (100 mL). The mixture was extracted with Et2O (100 mL) and the organic phase was washed with dilute aq. NaHCO3 (2 x 100 mL, saturated x 0.05) and finally with a little dilute hydrochloric acid to get a weakly acidic counterphase. The organic phase was concentrated and the residue dissolved in dichloromethane. Drying (Na2SO4) and evaporation afforded a crude product which on 1H NMR analysis proved to contain two diastereomers of **4** in the 72:28 ratio plus ca. 18 % of **3**. Purification on a silica gel column (39 x 4 cm) using toluene-ethyl acetate (first 20:1, then 10:1 and finally 5:1) as eluant gave 1.95 gof **4** (74 %). Part of both diastereomers were obtained in pure form with the minor component being eluted first.

Major isomer:mp 96-97 °C (Et2O, +35 to -15 oC); 1H NMR (CDCl3):  1.59-1.79 (m, 2H), 1.68 (s, 3H), 2.01-2.21 (m, 3H), 2.27-2.37 (m, 1H), 4.01 (d, *J* = 1.5 Hz, 1H, OH, exchangeable with D2O), 4.04 (d, *J* = 9.9 Hz, 1H), 4.91 (t, *J* = 1.6 Hz, 1H), 4.92 (dd, *J* = 9.6, 1.6 Hz, 1H), 4.99 (br s, 1H), 5.34 (pentet-like, *J* = 2 Hz, 1H), 7.51-7.58 (m, 2H), 7.62-7.68 (m, 1H), 7.81-7.87 (m, 2H); 13C NMR (CDCl3):  16.2 (q), 23.6 (t), 32.2 (t), 32.9 (t), 71.3 (d), 74.3 (d), 115.9 (t), 128.8 (d), 128.9 (d), 133.6 (s), 133.9 (d), 136.4 (d), 138.0 (s), 142.9 (d).

Minor isomer: mp 51-53 °C (Et2O, +35 to -15 oC); 1H NMR (CDCl3): 1.64 (d, *J* = 0.5 Hz, 3H), 1.72 (pentet-like, *J* ≈ 8 Hz, 2H), 2.11-2.45 (m, 4H), 3.28 (d, *J* = 2.6 Hz, 1H, OH, exchangeable with D2O), 3.90 (d, *J* = 2.4 Hz, 1H), 4.93 (sextet-like, *J* = 1.4 Hz, 1H), 4.96 (br s, 1H), 5.10 (s, 1H), 5.70 (pentet, *J* = 2.1 Hz, 1H), 7.50-7.60 (m, 2H), 7.60-7.68 (m, 1H), 7.80-7.88 (m, 2H).

13C NMR (CDCl3):  19.0 (q), 23.5 (t), 32.5 (t), 35.2 (t), 69.7 (d), 71.5 (d), 112.9 (t), 128.8 (d), 128.9 (d), 132.3 (s), 133.8 (d), 137.0 (d), 138.0 (s), 142.6 (s).

**4-Chloro-1-(1-cyclopentenyl)-3-methyl-1-phenylsulfonyl-2(*E*)-butene** (**5**)**.**

To a stirred and ice-cooled solution of **4** (426 mg, 1.46 mmol) in dichloromethane (10 mL) was added a solution of thionyl chloride (433 mg, 3.64 mmol) in dichloromethane (10 mL) over a period of 10 min, followed by a solution of pyridine (230 mg, 2.91 mmol) in dichloromethane (10 mL, 10 min). After 30 min the ice-bath was removed and stirring was continued for 2 h. The reaction mixture was washed with ice-water (2 x 30 mL), then dried (Na2SO4) and concentrated. Crystallization of the residue from dichloromethane/ Et2O gave **5**, mp 141-143 °C; three crops afforded 377 mg (83 %).

1H NMR (CDCl3):  1.42 (d, *J* = 1.3 Hz, 3H), 1.89 (pentet, *J* = 7.5 Hz, 2H), 2.25-2.40 (m, 2H), 2.40-2.55 (m, 2H), 3.97 (s, 2H), 4.58 (d, *J*  = 10.4 Hz, 1H), 5.71-5.79 (m, 2H; a down-field part integrating for ca. 0.5H consists of two signals separated by 1.3 Hz), 7.48-7-58 (m, 2H), 7.58-7.68 (m, 1H), 7.80-7.90 (m, 2H).

13C NMR (CDCl3):  14.4 (q), 23.2 (t), 32.6 (t), 33.9 (t), 50.6 (t), 66.9 (d), 120.7 (d), 128.9 (d), 129.2 (d), 129.3 (d), 133.6 (d), 134.4 (d), 134.5 (s), 138.0 (s), 139.3 (s).

**1-(1-Cyclopentenyl)-3-methyl-1-phenylsulfonyl-1(*E*)*-*1,3-butadiene** (**6**)**.**

A stirred mixture of **5** (354 mg, 1.14 mmol), anhydrous Cs2CO3 (3.71 g, 11.4 mmol) and THF (20 mL) was heated under reflux (6 h). The reaction mixture was partitioned between Et2O (100 mL) and water (50 mL). The organic layer was separated and washed with 50 mL of water. The ether was evaporated, dichloromethane was added and the solution dried (Na2SO4) and the solvent evaporated. This gave a crude product (300 mg) which contained (1H NMR) 95% of **6** and 3% of **7**. Crystallization from Et2O/toluene gave **6**, mp 93-95 °C; three crops gave 245 mg (78 %).

1H NMR (CDCl3):  1.81 (pentet, *J* = 7.5 Hz, 2H), 1.84 (t-like, *J* = 0.7 Hz, 3H), 2.23-2.38 (m, 4H), 5.31 (pentet, *J* = 1.5 Hz, 1H), 5.37-5.41 (m, 2H), 7.34 (s, 1H), 7.44-7.54 (m, 2H), 7.54-7.62 (m, 1H), 7.76-7.84 (m, 2H).

13C NMR (CDCl3):  20.5 (q), 23.7 (t), 33.4 (t), 37.4 (t), 125.4 (d), 128.5 (d), 128.7 (d), 133.0 (d), 134.0 (s), 137.4 (d), 138.7 (s), 139.1 (d), 139.4 (s), 139.7 (s).

UV (ethanol) max, nm (): 253 (19 500).

**4-Methyl-2-phenylsulfonyl-bicyclo[4.3.0]nona-1,3-diene** (**7**)**.** A solution of **6** (553 mg, 2.02 mmol) in toluene (50 mL) was refluxed for 3 h. Evaporation of the solvent and crystallization from toluene/pentane afforded **7**, mp 82-83 °C; two crops gave in all 536 mg (97 %).

1H NMR (CDCl3):  1.25 (m, 1H), 1.48-1.62 (m, 1H), 1.81 (s, 3H), 1.89 (d, *J*  = 19.2 Hz, 1H), 1.97 (m, 1H), 2.09 (m, 1H), 2.14 (dd, *J* = 16.4, 8.9 Hz, 1H), 2.56-2.73 (m, 2H), 3.14 (dd, *J* = 20.5, 8.6 Hz, 1H), 5.98 (s, 1H), 7.48-7.54 (m, 2H), 7.56-7.61 (m, 1H), 7.85-7.89 (m, 2H).

13C NMR (CDCl3):  23.0 (q), 24.9 (t), 30.9 (t), 32.8 (t), 33.4 (t), 44.4 (d), 115.9 (d), 127.1 (d), 129.0 (d), 129.2 (s), 132.9 (d), 137.1 (s), 141.8 (s), 156.0 (s).

LR-EI-MS: *m*/*z* (rel. abundance, %): 274 (M+, 25), 133 (100), 117 (32), 105 (46), 91 (22); HR-EI-MS: *m*/*z* 274.1022; calc. for C16H18O2S: 274.1028.

***t*-Cinnamyl phenyl sulfide** was prepared from cinnamyl alcohol (10.00 g; 74.5 mmol), thiophenol (10.70 g; 97.1 mmol) and BF3-etherate (11.69 g; 82.4 mmol) in dichloromethane (500 mL) by a slightly modified literature procedure.24 The reagents were mixed at ca. 0 oC and the mixture was stirred for 22h (22 C). Dichloromethane was evaporated and replaced with Et2O. The ethereal layer was washed first with 2 M NaOH (100 mL), then with weaker alkali and finally with water. Drying (Na2SO4), evaporation of the solvent and purification on a silica gel column yielded pure *t*-cinnamyl phenyl sulfide (7.94 g, 47 %, mp 74-77 oC). The 1H NMR spectrum was indistinguishable from that described.24

***t*-Cinnamyl phenyl sulfone**. Oxidation of the above sulfide with *m*-chloroperbenzoic acid was carried out as in the preparation of **3**. A crystallization from methanol provided pure sulfone (81%), mp 111-112.5 oC. 1H NMR (CDCl3):  3.95 (d, *J* = 7.5 Hz, 2H), 6.10 (dt, *J* = 15.9, 7.5 Hz, 1H), 6.37 (d, *J* = 15.9 Hz, 1H), 7.23-7.35 (m, 5H), 7.50-7.58 (m, 2H), 7.60-7.64 (m, 1H), 7.85-7.92 (m, 2H). The published 1H NMR data (CDCl3, 100 MHz)25 show fairly good agreement with ours. 13C NMR (CDCl3):  60.5 (t), 115.1 (d), 126.6 (d), 128.5 (d), 128.6 (d), 129.1 (d), 133.8 (d), 135.8 (s), 138.4 (s), 139.2 (d).

**1-Phenyl-3-phenylsulfonyl-1,5-heptadien-4-ol** (**9**)**.**

Cinnamyl phenyl sulfone (2.58 g, 10 mmol), butyllithium in hexane (1.6 M, 6.9 mL, 11 mmol) and crotonaldehyd (0.74 g, 10.5 mmol) was mixed as described above for **1b**. After 1 h at ca. –75 °C a solution of acetic acid (1.80 g, 30 mmol) in THF (10 mL) was added during 10 min. The cooling bath was removed and when the reaction mixture had reached 0 °C it was poured under stirring into water (100 mL). The product was extracted with Et2O (100 mL) and the organic phase was washed first four times with dilute (saturated x 0.2) aqueous NaHCO3 just enough to remove acetic acid, then with dilute hydrochloric acid to obtain a weakly acidic aqueous counterphase. The ethers were evaporated, dichloromethane was added (30 mL) and the solution was dried (Na2SO4). The residue obtained on evaporation (3.43 g) contained (1H NMR) <5% THF and **9** showing an estimated purity of >90%. This crude product was used without purification in the next step. The two dominating isomers of **9** were present in the 72:28 ratio.

Major isomer, 1H NMR (CDCl3):  1.66 (dd, *J*  = 6.5, 1.5 Hz, 3H), 3.79 (dd, *J*  = 10.1, 8.4 Hz, 1H), 3.97 (d, *J*  = 2.4 Hz, OH, exchangeable with D2O), 4.80 (dt, *J*  = 1.8, 8.3 Hz, 1H), 5.41 (ddq, *J*  = 15.2, 7.3, 1.7 Hz, 1H), 5.71 (dd, *J*  = 15.8, 10.1 Hz, 1H), 5.83 (ddq, *J*  = 15.2, 1.1, 6.6 Hz, 1H), 6.12 (d, *J*  = 15.8 Hz, 1H), 7.17-7.21 (m, 1H), 7.24-7.33 (m, 4H), 7.48-7.54 (m, 2H), 7.62-7.67 (m, 1H), 7.81-7.84 (m, 2H). 13C NMR (CDCl3), signals of uncertain origin are not mentioned:  17.7, 70.8, 74.5, 118.2, 126.6, 134.1, 135.7, 137.3, 138.6.

Minor isomer, 1H NMR (CDCl3), salient signals:  3.04 (d, *J* = 3.1 Hz, OH, exchangeable with D2O), 3.67 (dd, *J* = 9.7, 1.7 Hz, 1H), 5.05 (br d, *J* = 7.4 Hz, 1H), 6.19 (d, *J* = 15.9 Hz, 1H), 6.32 (dd, *J* = 16.1, 9.7 Hz, 1H). 13C NMR (CDCl3):  17.7, 70.1, 73.9, 116.2, 126.7, 133.9, 135.8, 137.6, 139.9 (signals of uncertain origin omitted) A third isomer, originating from cis-crotonaldehyde, gives rise to a signal at  1.73 (dd, *J* = 7.0, 1.7 Hz, ca. 4%).

**6-Chloro-1-phenyl-3-phenylsulfonyl-1,4-heptadiene** (**10**) **and 4-Chloro-1-phenyl-3-phenylsulfonyl-1,5-heptadiene** (**11**). To a stirred and cooled (0 oC) solution of the crude product **9** (1.37 g) in dichloromethane (40 mL) was added a solution of thionyl chloride (1.25 g) in dichloromethane (10 mL), followed by a solution of pyridine (0.51 g) in dichloromethane (10 mL). After 20 min the mixture was stirred at 22 oC for 4 h and then poured under stirring into ice-water. Separation of the phases, washing the organic layer twice with ice-water, drying (Na2SO4) and evaporation of the solvent gave a crude mixture of chlorides. On purification on a silica gel column (10 x 3 cm, toluene-ethyl acetate, 15:1) isomer **11** was eluted somewhat faster than **10**, giving both in enriched form. Regioisomers **10** and **11** both consisted of two diastereomers. Early fractions also contained the triene **12** (ca. 3%). The combined yield of chlorides (1.17 g) corresponds to a 84% yield over two steps (based on cinnamyl phenyl sulfone).

Major isomer of **10**, 1H NMR (CDCl3):  1.56 (d, *J* = 6.6 Hz, 3H), 4.36 (t, *J* = 8.1 Hz, 1H), 4.52 (pentet, *J* = 6.6 Hz, 1H), 5.72 (dd, *J* = 15.4, 7.3 Hz, 1H), 5.91 (dd, *J* = 15.4, 7.9 Hz, 1H), 6.16 (dd, *J* = 15.8, 8.4 Hz, 1H), 6.49 (d, *J* = 15.9 Hz, 1H), 7.10-7.38 (m, 5H), 7.46-7.57 (m, 2H), 7.59-7.68 (m, 1H), 7.78-7.90 (m, 2H).

Minor isomer of **10**, 1H NMR (CDCl3), salient signals:  1.52 (d, *J* = 6.6 Hz), 4.36 (t, *J* = 8.1 Hz), 4.52 (pentet, *J* = 6.6 Hz), 5.72 (dd, *J* = 15.4, 7.3 Hz), 5.88 (dd, *J* = 15.4, 8.1 Hz), 6.14 (dd, *J* = 15.7, 7.3 Hz), 6.49 (d, *J* = 15.9 Hz).

Major isomer of **11**, 1H NMR (CDCl3):  1.79 (dd, *J* = 6.6, 1.4 Hz, 3H), 4.05 (dd, *J* = 10.1, 3.3 Hz, 1H), 5.33 (dd, *J* = 8.8, 3.3 Hz, 1H), 5.72 (m, 1H), 6.02 (dq, *J* = 14.9, 6.7 Hz, 1H), 6.12 (dd, *J* = 15.7, 10.1 Hz, 1H), 6.30 (d, *J* = 15.6 Hz, 1H), aromatic hydrogens (ca. 10H).

Minor isomer of **11**, 1H NMR (CDCl3), salient signals:  1.69 (dd, *J* = 6.6, 1.6 Hz), 3.88 (dd, *J* ≈ 10 and 3 Hz), 5.26 (dd, *J* ≈ 8 and 3 Hz).

**1-Phenyl-3-phenylsulfonyl-(1*E,* 3*E*, 5*E*)-1,3,5-heptatriene** (**12**) was prepared from a ca. 3:1 mixture of major **10** and minor **10.** To a flame-dried flask (argon atmosphere, stirring bar) was added a solution of the chlorides (181 mg, 0.52 mmol) in dry THF (15 mL) and then cesium carbonate (1.70 g, 10 equiv.). The mixture was stirred and heated under reflux (1 h). After cooling it was partitioned between Et2O (50 mL) and water (30 mL). The ethereal layer was separated, the aqueous layer was extracted with Et2O and the combined organic layers were washed with water (20 mL). The solvent was evaporated, the residue was dissolved in dichloromethane and the solution dried (Na2SO4). Evaporation of the solvent followed by a treatment under high vacuum left 165 mg. 1H NMR analysis showed traces of the solvents and **12** being contaminated by ca. 11% of the (1*E,* 3*E*, 5*Z*) isomer (described below); a weak signal at  1.96 (dd, <2%) is most likely due to the (1*E*, 3*Z*, 5*E*) isomer. Cautiously estimated yield of **12**, >80%. Attempts to crystallize **12** in the normal way failed. TLC analysis showed that contaminants of lower mobility were being formed during the handling. When **12** is left in the open air a smell of benzaldehyde develops.

1H NMR (CDCl3) of **12**:  1.93 (dd, *J* = 6.6, 1.4 Hz, 3H), 6.37 (dq, *J* = 15.0, 6.7 Hz, 1H), 6.51 (ddq, *J* = 15.1, 10.8, 1.4 Hz, 1H), 6.75 (d, *J* = 16.2 Hz, 1H), 6.96 (d, *J* = 16.2 Hz, 1H), 7.2-7.6 (m, 8H), 7.8-8.0 (m, 2H). 13C NMR (CDCl3):  19.2 (q), 117.1 (d), 125.9 (d), 126.8 (d), 127.6 (d), 128.6(?), 128.7 (d), 129.0 (d), 133.0 (d), 135.6 (s), 136.3 (s), 136.6 (d), 138.4 (d), 140.6 (s), 142.8 (d).

**1-Phenyl-3-phenylsulfonyl-(1*E,* 3*E*, 5*Z*)-1,3,5-heptatriene**  1H NMR (CDCl3) salient signals: 2.00 (dd, *J* = 7.2, 1.5 Hz), 6.77 (d, *J* = 16.5 Hz).

13C NMR (CDCl3): , 117.0 (d), 123.5 (d), 126.8 (d), 127.8 (d), 129.0 (d), 132.3 (d), 133.1 (d), 136.3, 137.4 (d), 137.7, 138.6 (d), 140.5 (two signals are probably obscured).

**5-Methyl-6-phenyl-2-phenylsulfonyl-1,3-cyclohexadiene** (**13**). To a solution of **10** (401 mg, 1.14 mmol) in THF (30 mL, argon atmosphere) was added cesium carbonate (4.02 g, 10.8 equiv.). The mixture was refluxed under stirring for 3h and the solvent was then evaporated. The residue was partitioned between water (100 mL) and dichloromethane (100 mL). The organic phase was separated, washed with water and dried (Na2SO4) and the solvent was evaporated. After a high vacuum treatment the residue weighed 330 mg (93%). A 1H NMR analysis showed an essentially pure triene mixture. Compound **12** and its 5*Z*-isomer were present in the ratio 88:11. The residue was treated with refluxing toluene (60 mL, 5.3 h). Evaporation of the toluene and treatment under high vacuum (1 h) gave a crude product (328 mg) which, cautiously estimated, contained >90% of **13** (1H NMR). Purification on a silica gel column (35 x 2.5 cm) using toluene as eluant afforded 168 mg (47%) of **13**. Crystallization from Et2O (one crop) yielded 75 mg, mp 96-97 oC. HR-EI-MS: *m*/*z* 310.1013; calc. for C19H18O2S: 310.1028. 1H NMR (CDCl3): 0.66 (d, *J* = 7.3 Hz, 3H), 2.69 (m, 1H), 3.87 (dd, *J* = 9.0, 4.2 Hz, 1H), 5.91 (dd, *J* = 9.8, 4.5 Hz, 1H), 6.14 (dt, *J* = 9.9, 1.6 Hz, 1H), 7.08 (ddd, *J* = 4.4, 1.6, 0.7 Hz, 1H), 7.14-7.19 (m, 2H), 7.24-7.34 (m, 3H), 7.52-7.58 (m, 2H), 7.60-7.66 (m, 1H), 7.89-7.95 (m, 2H).

13C NMR (CDCl3):  13.7 (q), 33.2 (d), 45.1 (d), 117.5 (d), 127.3 (d), 127.8 (d), 128.5 (d), 128.7 (d), 129.2 (d), 133.4 (d), 136.6 (d), 137.3 (d), 137.9 (s), 138.9 (s), 140.0 (s).

**Kinetic study of the ring-closure of 12 to 13.** A mixture of trienes (166 mg) was prepared as above and dissolved in toluene (15 mL). The solution was heated in an oil bath set at 100 oC. Five aliquots (ca. 0.5 mL) were taken out during the course of 5 h and were immediately cooled. After evaporation of the toluene (motor-driven pump, ≤30 oC in the bath) the samples were subjected to 1H NMR analysis. The integrals of the signals from the methyl groups in **12** and **13** were measured to determine the extent of the reaction. Results (time; % **12** left): 1 h, 41%; 2 h, 20%; 3 h, 10%; 3.8 h, 6%; 5 h, 2%. These values give a calculated half-life *t*1/2 = 0.9 h. During the course of the reaction the signal at  2.00 (CH3 in the 1*E*, 3*E*, 5*Z* isomer) showed no significant change of its 12% proportion of the integral over all CH3 signals in the sample.

## References

(20) O. S. Andell, J.-E. Bäckvall, *Tetrahedron Lett.* 1985, **26**, 4555-4558; J.-E. Bäckvall, C. Löfström, S. K. Juntunen, M. Mattson, *Tetrahedron Lett.* 1993, **34**, 2007-2010; A. M. Ericsson, N. A. Plobeck, J.-E. Bäckvall, *Acta Chem. Scand.* 1994, **48**, 252-257.

(21) Y. Chen, J. B. Evarts, Jr., E. Torres, P. L. Fuchs, *Org. Lett.* 2002, **4**, 3571-3574.

(22) P. Canonne, M. Belley, G. Fytas, J. Plamondon, *Can. J. Chem.* 1988, **66**, 168-173; M. Hannaby, S. Warren, *J. Chem. Soc., Perkin Trans. 1* 1989, 303-311.

(23) N. Ono, I. Hamamoto, T. Kawai, A. Kaji, R. Tamura, M. Kakihana, *Bull. Chem. Soc. Jpn.* 1986, **59**, 405-410.

(24) S.-C. Tsay, L. C. Lin, P. A. Furth, C. C. Shum, D. B. King, S. F. Yu, B.-L. Chen, J. R. Hwu, *Synthesis* 1993, 329-334.

(25) A. Jonczyk, T. Radwan-Pytlewski, *Pol. J. Chem*. 1995, **69**, 1422-1427.
